# Supplementary material for: Lateral dielectrophoretic microseparators to measure the size distribution of blood cells
Source: Royal Society of Chemistry journal article supplement (doi:10.1039/c1lc20413k), 2011-01-01
Supplement: c1lc20413k.pdf [file c1lc20413k.pdf]

## Supplementary Information

Real Part of the Clausius-Mossotti Factor ( $\text{Re}[f_{\text{CM}}]$ )  
of RBCs, T cells, B cells, Granulocytes, and Monocytes  
Suspended in a Low-Conductivity Medium ( $0.17 \text{ S m}^{-1}$ )

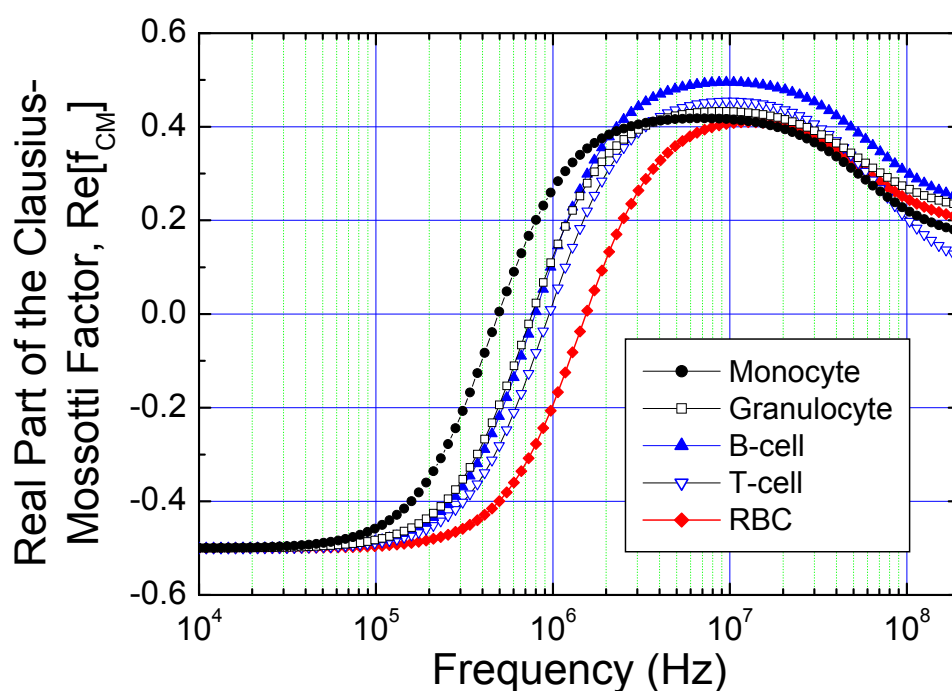

**Fig. S1** Calculated real part of the Clausius-Mossotti factor ( $\text{Re}[f_{\text{CM}}]$ ) of human peripheral blood RBCs ( $\blacklozenge$ ), T cells ( $\blacktriangledown$ ), B cells ( $\blacktriangle$ ), granulocytes ( $\blacksquare$ ), and monocytes ( $\bullet$ ) in a suspension medium with a conductivity  $0.17 \text{ S m}^{-1}$ . The parameters used for calculation were the measured size of each blood cell subpopulation and dielectric parameters reported by Yang et al.<sup>2,13,28</sup>

## Histograms Showing the Size Distribution of Human Peripheral Blood Cell Subpopulations

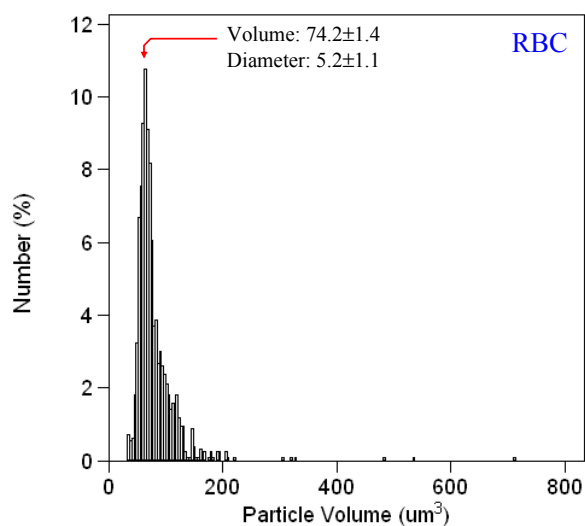

(a) RBCs

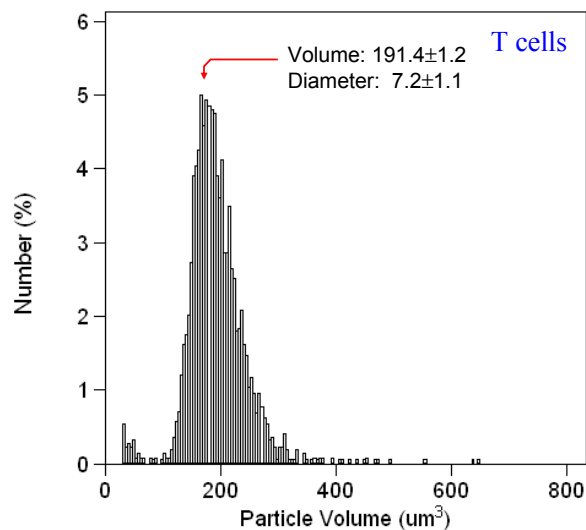

(b) T cells

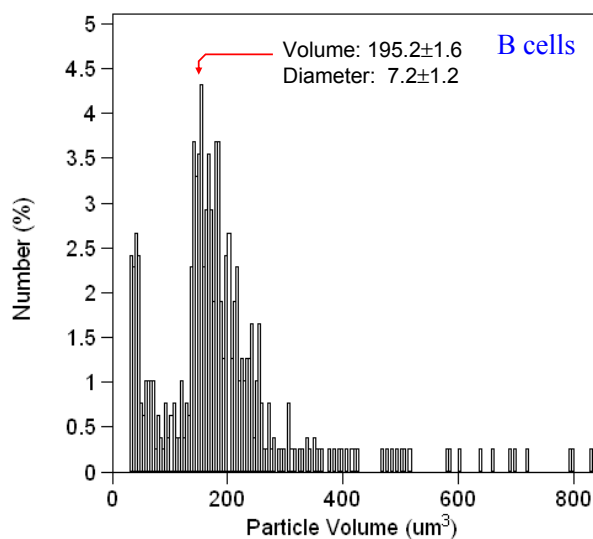

(c) B cells

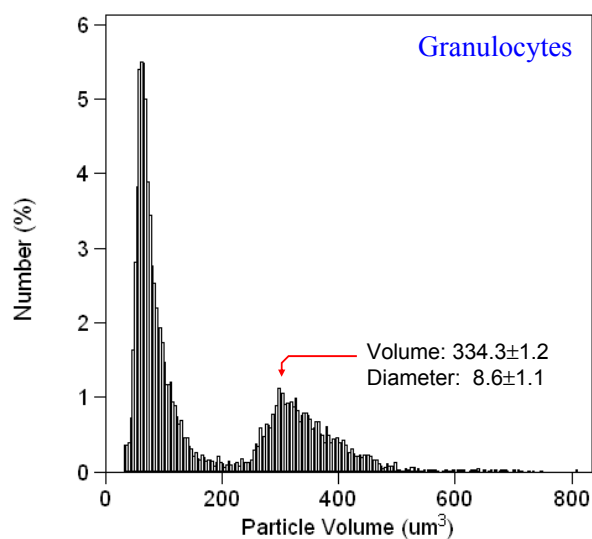

(d) Granulocytes

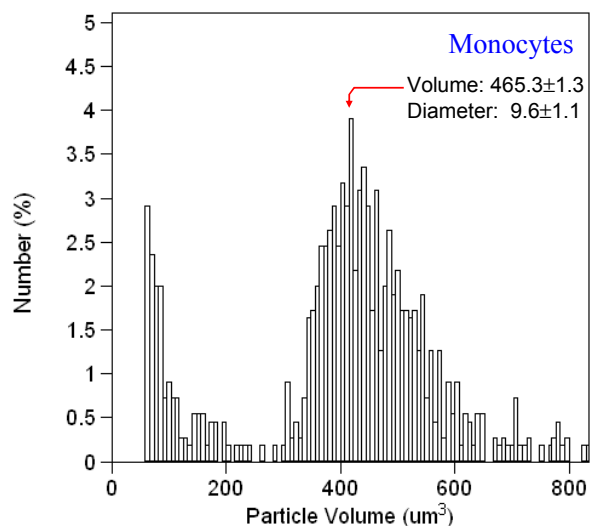

(e) Monocytes

**Fig. S2** Histograms showing the size distribution of human peripheral blood (a) RBCs, (b) T cells, (c) B cells, (d) granulocytes, and (e) monocytes. The measured mean volumes and diameters of the blood cell subpopulations with one standard deviation at 95% confidence limits are summarized in Table 1.

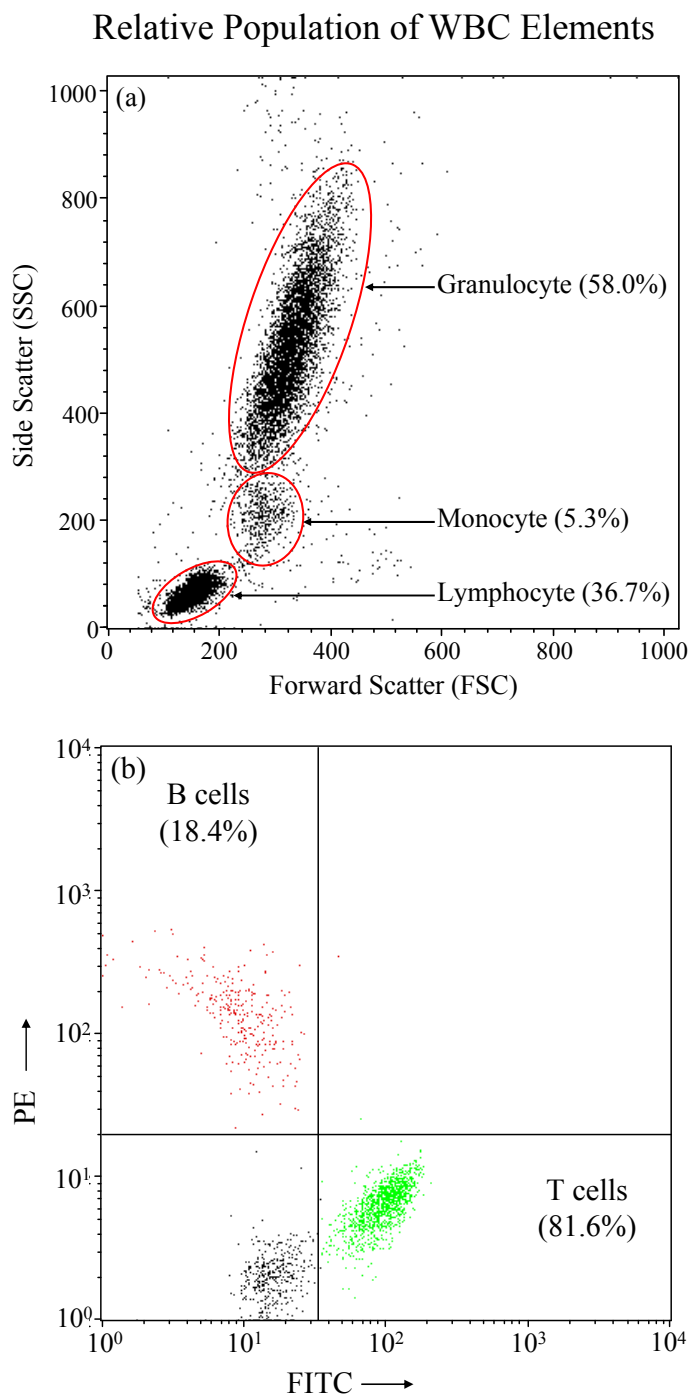

**Fig. S3** FACS scatter plots showing (a) forward and sidelight scatter properties of human peripheral blood treated by RBC lysis buffer and (b) fluorescently labeled lymphocytes with anti-CD3- FITC and anti-CD20-PE.
